# Supplementary material for: Inactivation of H+-ATPase Participates in the Influence of Variation Potential on Photosynthesis and Respiration in Peas
Source: MDPI journal article supplement (doi:10.3390/plants9111585), 2020-11-16
Supplement: s1 [file s1]

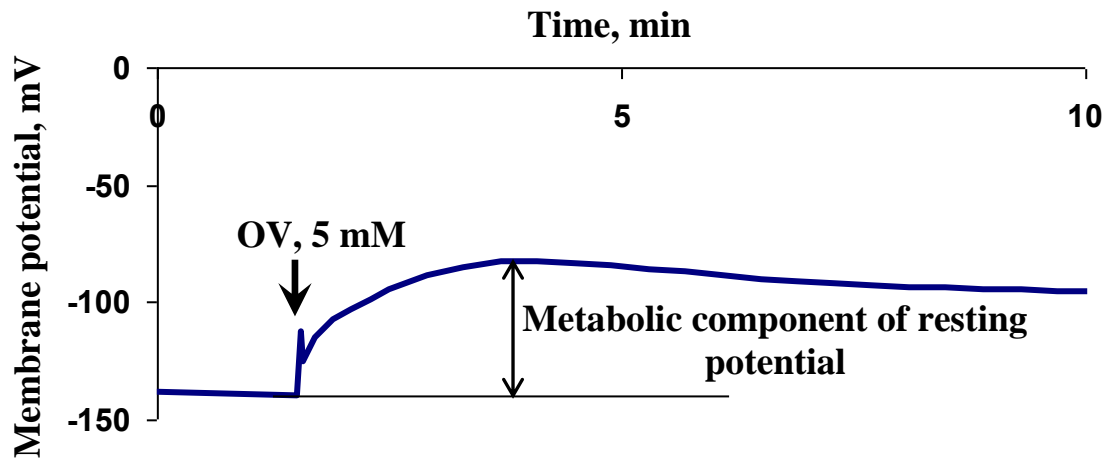

**Figure S4.** Example of change in membrane potential, induced by 5 mM sodium orthovanadate (OV), and measurement of metabolic component of resting potential. The magnitude of the metabolic component, which showed activity of  $H^+$ -ATPase in the plasma membrane, was estimated as amplitude of short-term changes in membrane potential after action of the high concentration of OV (5 mM). Arrow marked the injection of OV into solution, which surrounded investigated cells.
