# Supplementary material for: Inactivation of H+-ATPase Participates in the Influence of Variation Potential on Photosynthesis and Respiration in Peas
Source: MDPI journal article supplement (doi:10.3390/plants9111585), 2020-11-16
Supplement: s1 [file s1]

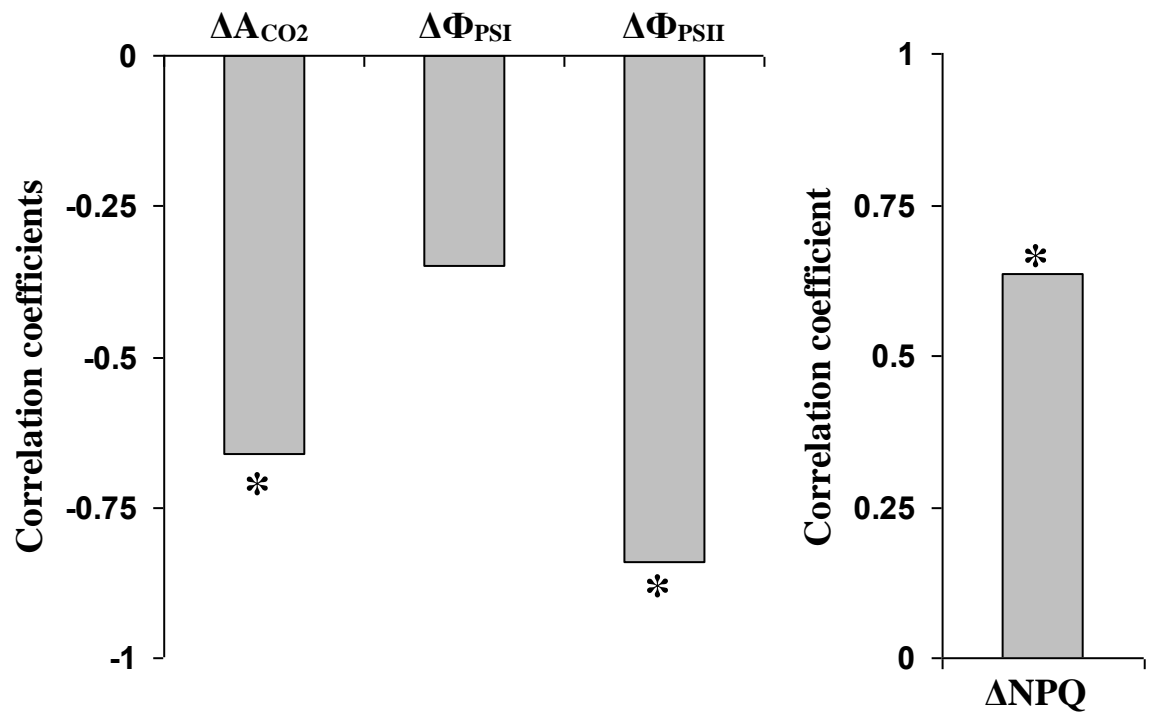

**Figure S1.** Linear correlation coefficients between amplitudes of variation potentials and local burning-induced changes in CO<sub>2</sub> assimilation ( $\Delta A_{CO_2}$ ), quantum yields of photosystem I ( $\Delta \Phi_{PSI}$ ) and II ( $\Delta \Phi_{PSII}$ ), and non-photochemical quenching of chlorophyll fluorescence ( $\Delta NPQ$ ). Correlation coefficients were calculated on basis of all experimental variants for investigation of local burning influence on photosynthesis, including pea seedlings under control conditions, after treatment by 0.5 mM sodium orthovanadate and after treatment by 1  $\mu$ M fusicoccin ( $n=16$ ). \*, correlation coefficient was significant ( $p<0.05$ ).
