# Supplementary material for: Inactivation of H+-ATPase Participates in the Influence of Variation Potential on Photosynthesis and Respiration in Peas
Source: Plants (Basel). 2020 Nov 16;9(11):1585. doi: 10.3390/plants9111585 (PMC7697462; doi:10.3390/plants9111585)
Supplement: Supplementary file 1 [file plants-09-01585-s001.zip]

Archive with 4 entries (4 files):
- Fig. S1.pdf
- Fig. S2.pdf
- Fig. S3.pdf
- Fig. S4.pdf
